# Supplementary material for: Development of a Bispecific IgG1 Antibody Targeting BCMA and PDL1
Source: Antibodies (Basel). 2024 Feb 20;13(1):15. doi: 10.3390/antib13010015 (PMC10885062; doi:10.3390/antib13010015)
Supplement: Supplementary file 1 [file antibodies-13-00015-s001.zip]

Archive with 5 entries (5 files):
- FigureS1 rev proofs.pdf
- FigureS2.pdf
- FigureS3.pdf
- FigureS4.pdf
- FigureS5 rev proofs.pdf
